# Supplementary material
Source: PubMed Central journal article supplement (PMC3611330)
Supplement: NIHMS367373-supplement-Suppl3.pdf [file NIHMS367373-supplement-Suppl3.pdf]

**METHOD 3: Differential gene expression analysis:** For differential gene expression analysis, redundant features and features with an intra-group coefficient of variation  $>25\%$  or absolute fold-change of less than 1.5-fold between obese and lean groups were excluded, resulting in 3006 features. Differentially expressed genes were identified via the Comparative Marker Selection algorithm in GenePattern software (<http://www.broadinstitute.org/cancer/software/genepattern/>) using standard t-tests and asymptotic p-values for ascertainment of statistical significance. A false-discovery rate (FDR) was calculated to control for multiple testing
