# Supplementary material
Source: PubMed Central journal article supplement (PMC3611330)

**Supplemental Figure 7:** Identification of ‘chemokine signaling’ as a key downregulated function in obese subjects based on analysis performed in DAVID software (Database for Annotation, Visualization and Integrated Discovery, <http://david.abcc.ncifcrf.gov/>). A list of 2234 Agilent probes (downregulated at 1.5-fold or greater in the obese compared to lean) was entered as input into DAVID. Functional annotation of the top KEGG pathways identified the ‘chemokine signaling’ pathway as a highly enriched module (Fisher exact  $p < 1.2E-7$ , Benjamini FDR 6.8E-6). Among all genes in the pathway, the genes marked with a red star satisfied the fold-change threshold criteria for input into DAVID.

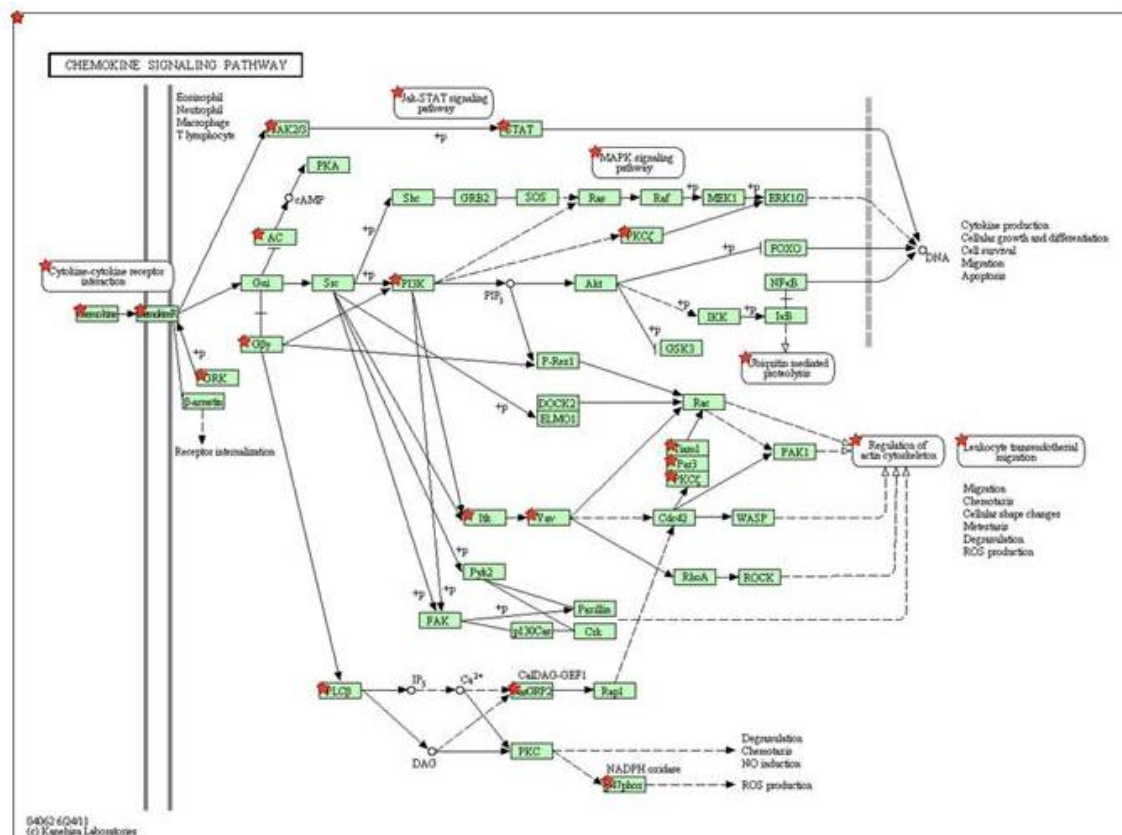

Supplement: NIHMS367373-supplement-Suppl10.pdf [file NIHMS367373-supplement-Suppl10.pdf]
