# Supplementary material
Source: PubMed Central journal article supplement (PMC3611330)

**Supplemental Figure 8:** Comparison of microarray and qPCR results for selected chemokines. White bars represent fold changes obtained from qPCR data and black bars represent fold-changes from microarray data. All fold-changes are reported as obese vs. lean comparisons.

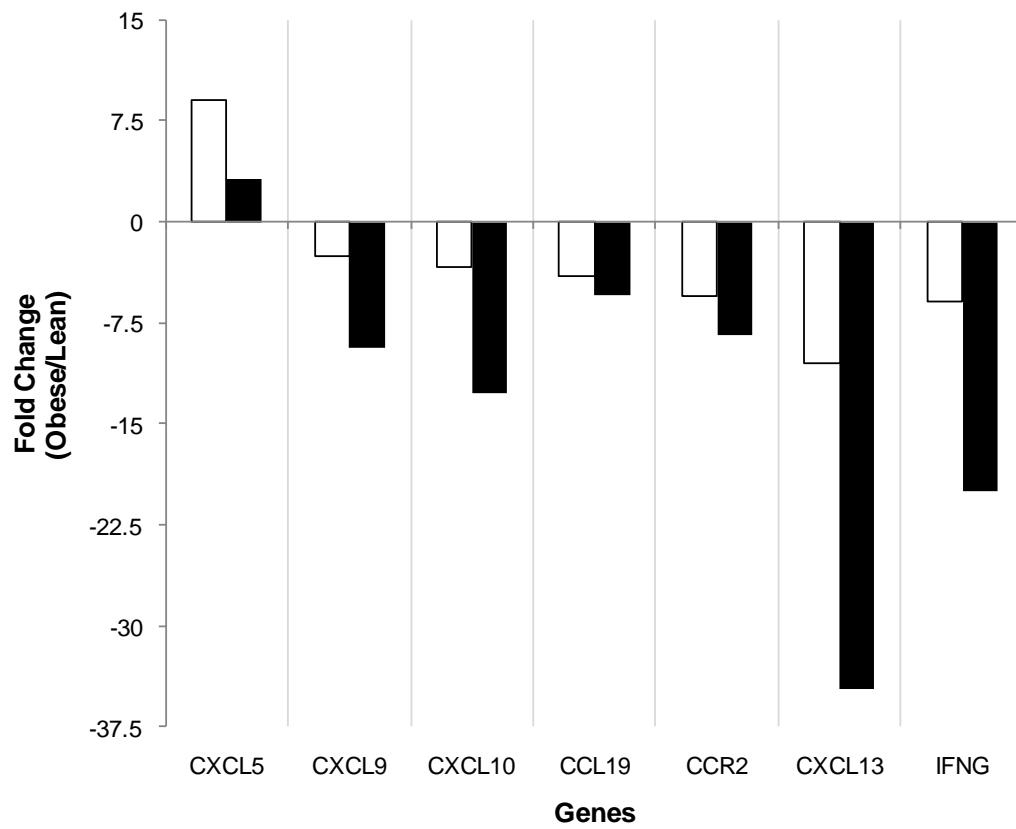

Supplement: NIHMS367373-supplement-Suppl11.pdf [file NIHMS367373-supplement-Suppl11.pdf]
