# Supplementary material
Source: PubMed Central journal article supplement (PMC3611330)
Supplement: NIHMS367373-supplement-Suppl13.pdf [file NIHMS367373-supplement-Suppl13.pdf]

**Supplemental Table 2:** The common intersection of genelists created from the top 5 pathways identified as significantly downregulated in the obese (GSEA analysis) from each of KEGG, Biocarta and Custom databases. A total of 26 genes were identified as common among all 3 pathway databases.

| <b>GeneSymbol</b> | <b>EntrezGene ID</b> |
|-------------------|----------------------|
| CD3D              | 915                  |
| CD3E              | 916                  |
| CD3G              | 917                  |
| CD247             | 919                  |
| CD4               | 920                  |
| CD28              | 940                  |
| CD80              | 941                  |
| CD86              | 942                  |
| CD40LG            | 959                  |
| CSF2              | 1437                 |
| GRB2              | 2885                 |
| HLA-DRA           | 3122                 |
| HLA-DRB1          | 3123                 |
| IFNG              | 3458                 |
| IL2               | 3558                 |
| IL4               | 3565                 |
| IL5               | 3567                 |
| IL12A             | 3592                 |
| IL12B             | 3593                 |
| ITK               | 3702                 |
| LCK               | 3932                 |
| PTPRC             | 5788                 |
| TGFB1             | 7040                 |
| ZAP70             | 7535                 |
| CXCR4             | 7852                 |
| ICOSLG            | 23308                |
